# Supplementary material for: A systematic review of necrotising fasciitis in children from its first description in 1930 to 2018
Source: Springer Nature journal article supplement (doi:10.1186/s12879-019-3941-3), 2019-04-11
Supplement: MOESM2 [file 16650022]

**Data extraction sheet for the systematic review on necrotizing fasciitis in childhood**

|                                         |                   |                                  |                                |                                            |                    |                          |                   |          |
|-----------------------------------------|-------------------|----------------------------------|--------------------------------|--------------------------------------------|--------------------|--------------------------|-------------------|----------|
| Journal                                 | Year              | Volume                           | Pages                          | First Author                               | Study type         |                          |                   | Duration |
| Institution                             | Geographic region |                                  | NecFasc                        | Cases                                      | Pediatric          | Age                      | Sex               | Race     |
| Inclusion criteria:<br>(Present)        | Age group         | Symptoms                         | Systemic illness               |                                            | Risk factors       |                          | Case fatality     |          |
| Exclusion criteria:<br>(Present)        | Only adult data   |                                  | Pediatric data not extractable |                                            |                    | Language requirement met |                   |          |
| Incidence of NecFasc                    |                   | Definition of population at risk |                                |                                            | Case Fatality rate |                          | Individual cases? |          |
| Skin symptoms reported (with frequency) |                   |                                  |                                | Signs of systemic illness (with frequency) |                    |                          |                   |          |
| Microbes reported (with frequency)      |                   |                                  |                                | Risk factors reported (with frequency)     |                    |                          |                   |          |
| Body region involved (with frequency)   |                   |                                  |                                | Outcome/Sequelae (with frequency)          |                    |                          |                   |          |
| Quality assessment                      |                   |                                  |                                | Laboratory data                            |                    |                          |                   |          |
| Case number in statistical analysis     |                   |                                  |                                | Other                                      |                    |                          |                   |          |
